# Supplementary material
Source: MDPI journal article supplement (https://www.mdpi.com/2073-4441/16/10/1352)
Supplement: s1 [file s1 › water-2907446-supplementary.pdf]

## Supplementary File

Table S1 Primer set used for *Cryptosporidium* (Elsafi et al., 2013)

| Primer      | Primer sequence       | Prediction (amplicon size) |
|-------------|-----------------------|----------------------------|
| Forward CSF | AGTGCTTAAAGCAGGCAACTG | 556 bp                     |
| Reverse CSF | CGTTAACGGAATTAACCAGAC |                            |

Table S2. Characteristics of prominent water bodies sampled in Dhaka City.

| Name of lakes  | Geographic location    | Surface area (ha) | Length (km) | Width (m) | Depth (m) | Prominent water quality status                                                                                                                                                                                                                                                                                                                                                                                                                | Also reported by               |
|----------------|------------------------|-------------------|-------------|-----------|-----------|-----------------------------------------------------------------------------------------------------------------------------------------------------------------------------------------------------------------------------------------------------------------------------------------------------------------------------------------------------------------------------------------------------------------------------------------------|--------------------------------|
| Dhanmondi Lake | 23°43' N and 90° 26' E | 37                | 3           | 35–100    |           | <ul style="list-style-type: none"> <li>The water's color had turned green.</li> <li>A foul smell due to the presence of excess nutrients and toxic metals from domestic and industrial wastes in the water body was observed.</li> </ul>                                                                                                                                                                                                      | (Sabit, 2011)                  |
| Gulshan Lake   | 23°48' N and 90° 25' E | 100               | 0.0160      | 3.8       | 2.5       | <ul style="list-style-type: none"> <li>The levels of some toxic metals in lake water had exceeded allowable limits.</li> <li>The deep green color of the water revealed the presence of algal blooms.</li> <li>The levels of essential minerals in the lake water did not meet the requirements for drinking water.</li> <li>The BOD level of the lake considerably exceeded the critical values for aquatic organisms and fishes.</li> </ul> | (S. S. Rahman & Hossain, 2019) |
| Banani Lake    | 23.048' N and 90.025'  | 32.7              | 3.43        | 2.89      | 2.0       | <ul style="list-style-type: none"> <li>The levels of Cd, As, Ni, and Pb in lake water exceeded normal fishing, industrial, and irrigation water standard values.</li> <li>The disposal of several types of waste had substantially reduced the oxygen level of the lake water.</li> </ul>                                                                                                                                                     | (Rahaman et al., 2017)         |

|               |                             |    |      |      |      |                                                                                                                                                                                                                                                              |                                |
|---------------|-----------------------------|----|------|------|------|--------------------------------------------------------------------------------------------------------------------------------------------------------------------------------------------------------------------------------------------------------------|--------------------------------|
| Ramna Lake    | E                           |    |      |      |      | <ul style="list-style-type: none"> <li>The EC, DO, BOD, and toxic metal levels of lake water exceeded drinking and irrigation standard limits.</li> </ul>                                                                                                    |                                |
|               | 23.7365° N,                 | 75 | 0.81 | 9–94 | 2.19 | <p>Toxic metals (Cd, Pb, Zn, and Mn) were found in Ramna Lake at levels that were</p> <p>far higher than the standard limit for drinking and irrigation purposes.</p> <p>Ramna Lake had a high BOD value.</p>                                                | (J. B. Islam et al., 2015)     |
| Crescent Lake | 90.4006° E                  |    |      |      |      |                                                                                                                                                                                                                                                              |                                |
|               | 23°45'53" N,<br>90°22'43" E | 50 | 0.65 | NA   | 1.98 | <ul style="list-style-type: none"> <li>The water of the lake was greenish due to the presence of</li> <li>several types of wastes and human feces.</li> </ul> <p>A considerable number of heavy metals and other pollutants contaminated the lake water.</p> | (S. S. Rahman & Hossain, 2019) |

---
